# Supplementary material for: More complex than originally thought: revisiting the origins of the relaxation processes in dimethylammonium zinc formate
Source: Royal Society of Chemistry journal article supplement (doi:10.1039/d2tc00089j), 2022-01-01
Supplement: d2tc00089j1.pdf [file d2tc00089j1.pdf]

Electronic Supporting information

for

**More complex than originally thought: revisiting origins of the relaxation  
processes in the dimethylammonium zinc formate**

**Table S1.** Crystal data, data collection and refinement results for partially DMAZnD

|                                                                                                                |                                                                                               |
|----------------------------------------------------------------------------------------------------------------|-----------------------------------------------------------------------------------------------|
| <b>Crystal data</b>                                                                                            |                                                                                               |
| Chemical formula                                                                                               | C <sub>10</sub> H <sub>16</sub> D <sub>6</sub> N <sub>2</sub> O <sub>12</sub> Zn <sub>2</sub> |
| <i>M<sub>r</sub></i>                                                                                           | 499.07                                                                                        |
| Crystal system, space group                                                                                    | <b>Triclinic, <i>P1</i></b>                                                                   |
| Temperature (K)                                                                                                | 100                                                                                           |
| <i>a</i> , <i>b</i> , <i>c</i> (Å)                                                                             | 8.1573 (9), 8.1491 (7), 8.8244 (10)                                                           |
| $\alpha, \beta, \gamma$ (°)                                                                                    | 61.343 (10), 62.557 (11), 60.057 (10)                                                         |
| <i>V</i> (Å <sup>3</sup> )                                                                                     | 426.70 (10)                                                                                   |
| <i>Z</i>                                                                                                       | 1                                                                                             |
| <i>m</i> (mm <sup>-1</sup> )                                                                                   | 2.88                                                                                          |
| Crystal size (mm)                                                                                              | 0.15 × 0.10 × 0.08                                                                            |
| <b>Data collection</b>                                                                                         |                                                                                               |
| No. of measured, independent and observed [ <i>I</i> > 2σ( <i>I</i> )] reflections                             | 3141, 3141, 2758                                                                              |
| (sin <i>q</i> / <i>l</i> ) <sub>max</sub> (Å <sup>-1</sup> )                                                   | 0.707                                                                                         |
| <b>Refinement</b>                                                                                              |                                                                                               |
| <i>R</i> [ <i>F</i> <sup>2</sup> > 2σ( <i>F</i> <sup>2</sup> )], <i>wR</i> ( <i>F</i> <sup>2</sup> ), <i>S</i> | 0.052, 0.145, 1.06                                                                            |
| No. of reflections                                                                                             | 3141                                                                                          |
| No. of parameters                                                                                              | 236                                                                                           |
| No. of restraints                                                                                              | 87                                                                                            |
| H-atom treatment                                                                                               | H-atom parameters constrained                                                                 |
| Dρ <sub>max</sub> , Dρ <sub>min</sub> (e Å <sup>-3</sup> )                                                     | 1.38, -1.36                                                                                   |

|                              |                                                                   |
|------------------------------|-------------------------------------------------------------------|
| Absolute structure           | Classical Flack method preferred over Parsons because s.u. lower. |
| Absolute structure parameter | 0.39 (4)                                                          |

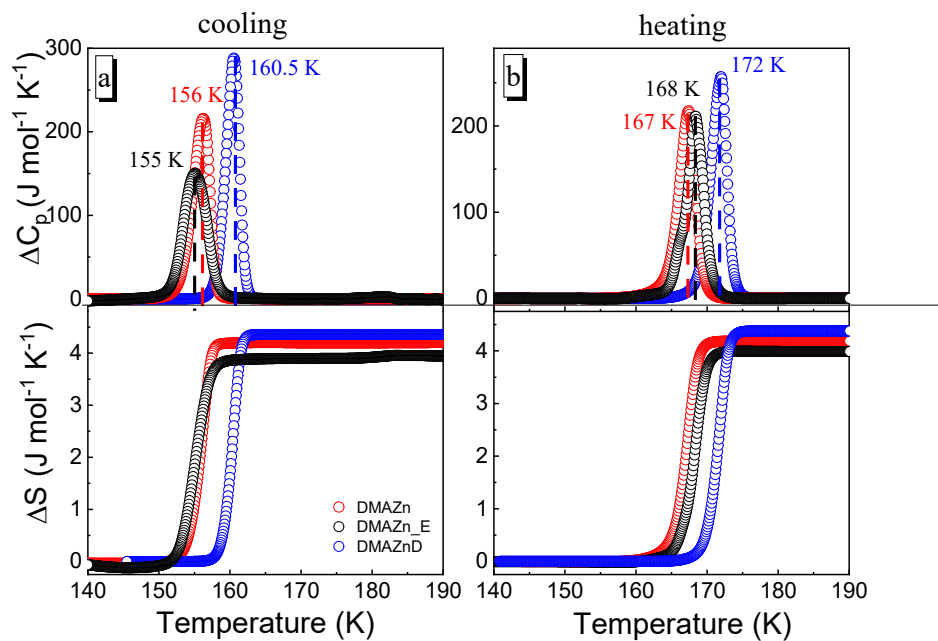

**Figure S1** The change in the heat capacity and entropy related to the phase transition in  $\text{DMAZn}^1$ ,  $\text{DMAZn}_E$  and  $\text{DMAZnD}^2$  measured in (a) cooling and (b) heating modes.

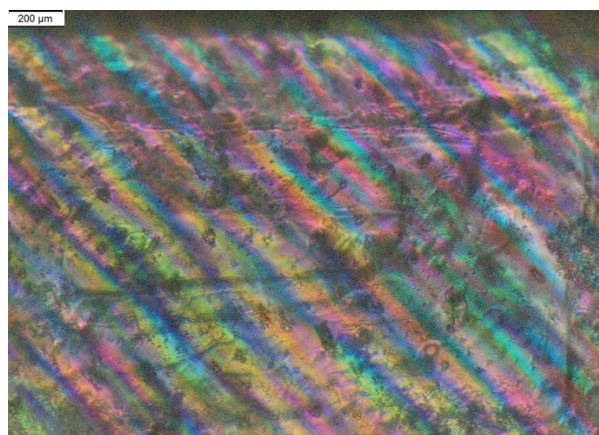

**Figure S2** The ferroelastic domain structure of  $\text{DMAZn}$ .

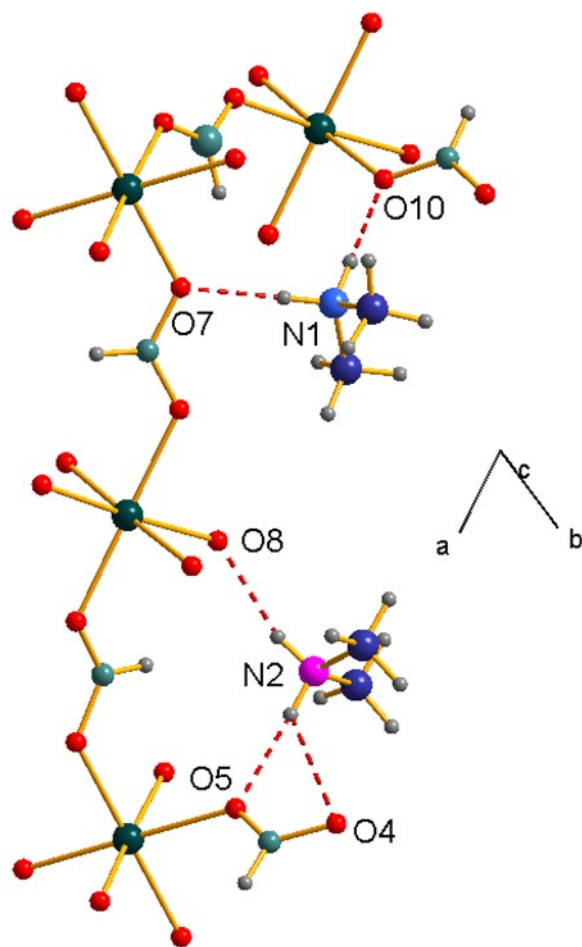

**Figure S3** Atom numbering scheme for hydrogen-bonds. DMAZn-formate,  $T=100\text{K}$ .

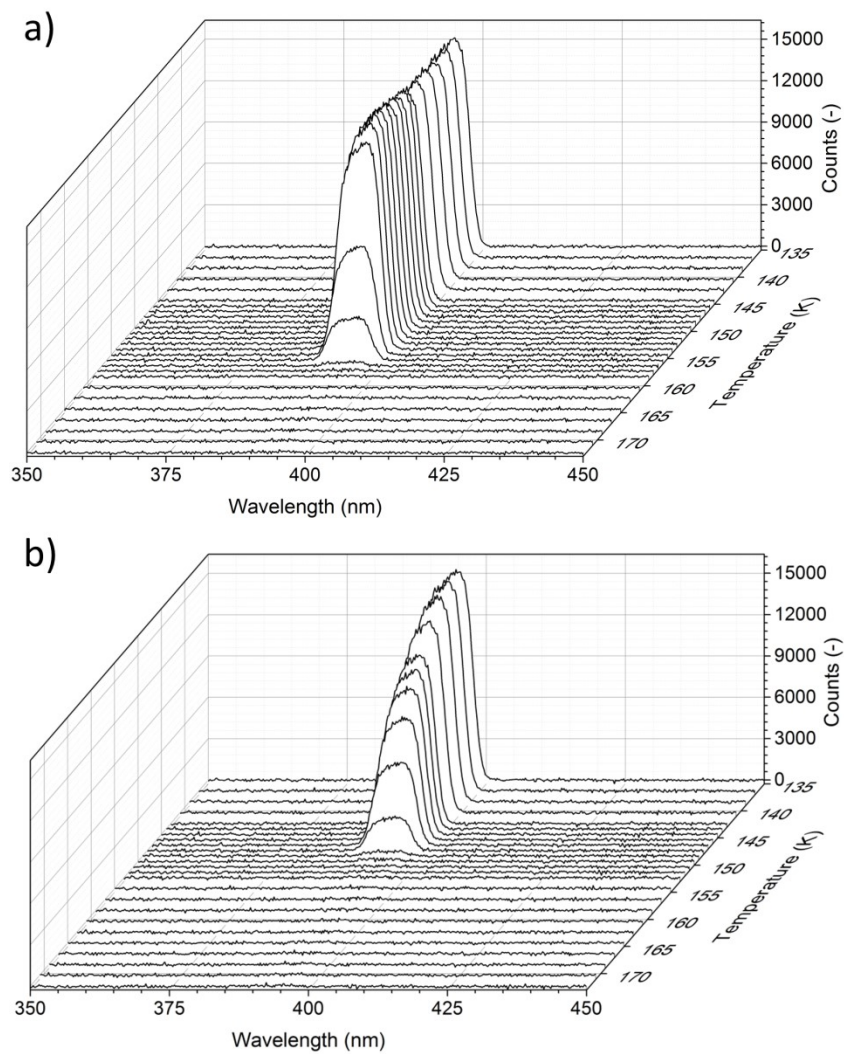

**Figure S4.** Experimental SHG spectra obtained upon a) heating run and b) cooling run.

**Table S2.** Selected geometric parameters ( $\text{\AA}$ ,  $^\circ$ )

|             |            |                            |            |
|-------------|------------|----------------------------|------------|
| Zn1—O3      | 2.081 (11) | O3—C7                      | 1.229 (17) |
| Zn1—O4      | 2.090 (11) | O4—C8                      | 1.289 (13) |
| Zn1—O9      | 2.101 (10) | O5—C8 <sup>i</sup>         | 1.238 (17) |
| Zn1—O8      | 2.106 (9)  | O6—C9 <sup>ii</sup>        | 1.243 (14) |
| Zn1—O2      | 2.115 (10) | O7—C10 <sup>iii</sup>      | 1.258 (14) |
| Zn1—O10     | 2.139 (10) | O8—C6                      | 1.278 (15) |
| Zn2—O6      | 2.068 (10) | O9—C10                     | 1.256 (16) |
| Zn2—O11     | 2.095 (8)  | O10—C5                     | 1.250 (15) |
| Zn2—O12     | 2.098 (10) | O11—C5 <sup>iv</sup>       | 1.261 (18) |
| Zn2—O1      | 2.103 (11) | O12—C6 <sup>v</sup>        | 1.269 (14) |
| Zn2—O7      | 2.107 (11) | C1—N1                      | 1.46 (2)   |
| Zn2—O5      | 2.136 (10) | C2—N1                      | 1.44 (2)   |
| O1—C7       | 1.272 (15) | C3—N2                      | 1.51 (2)   |
| O2—C9       | 1.236 (15) | N2—C4                      | 1.49 (2)   |
|             |            |                            |            |
| O3—Zn1—O4   | 94.6 (4)   | O6—Zn2—O5                  | 84.7 (4)   |
| O3—Zn1—O9   | 177.3 (5)  | O11—Zn2—O5                 | 179.6 (6)  |
| O4—Zn1—O9   | 87.7 (4)   | O12—Zn2—O5                 | 90.2 (4)   |
| O3—Zn1—O8   | 93.0 (4)   | O1—Zn2—O5                  | 90.9 (5)   |
| O4—Zn1—O8   | 90.8 (4)   | O7—Zn2—O5                  | 88.3 (4)   |
| O9—Zn1—O8   | 88.3 (4)   | C7—O1—Zn2                  | 126.0 (8)  |
| O3—Zn1—O2   | 90.4 (4)   | C9—O2—Zn1                  | 125.7 (9)  |
| O4—Zn1—O2   | 91.1 (4)   | C7—O3—Zn1                  | 125.8 (7)  |
| O9—Zn1—O2   | 88.2 (4)   | C8—O4—Zn1                  | 127.2 (8)  |
| O8—Zn1—O2   | 176.0 (5)  | C8 <sup>i</sup> —O5—Zn2    | 127.1 (8)  |
| O3—Zn1—O10  | 87.1 (4)   | C9 <sup>ii</sup> —O6—Zn2   | 128.0 (9)  |
| O4—Zn1—O10  | 178.3 (5)  | C10 <sup>iii</sup> —O7—Zn2 | 123.7 (7)  |
| O9—Zn1—O10  | 90.6 (4)   | C6—O8—Zn1                  | 124.1 (9)  |
| O8—Zn1—O10  | 88.9 (4)   | C10—O9—Zn1                 | 126.4 (6)  |
| O2—Zn1—O10  | 89.1 (4)   | C5—O10—Zn1                 | 126.9 (9)  |
| O6—Zn2—O11  | 95.3 (4)   | C5 <sup>iv</sup> —O11—Zn2  | 127.8 (8)  |
| O6—Zn2—O12  | 174.6 (5)  | C6 <sup>v</sup> —O12—Zn2   | 124.2 (8)  |
| O11—Zn2—O12 | 89.8 (4)   | O10—C5—O11 <sup>vi</sup>   | 123.6 (11) |
| O6—Zn2—O1   | 89.2 (5)   | O12 <sup>vii</sup> —C6—O8  | 123.0 (12) |
| O11—Zn2—O1  | 89.5 (4)   | O3—C7—O1                   | 124.4 (10) |
| O12—Zn2—O1  | 89.3 (4)   | O5 <sup>viii</sup> —C8—O4  | 124.6 (10) |
| O6—Zn2—O7   | 92.3 (4)   | O2—C9—O6 <sup>ix</sup>     | 127.0 (12) |
| O11—Zn2—O7  | 91.3 (4)   | O9—C10—O7 <sup>x</sup>     | 123.6 (9)  |

|            |           |          |            |
|------------|-----------|----------|------------|
| O12—Zn2—O7 | 89.1 (4)  | C2—N1—C1 | 113.6 (15) |
| O1—Zn2—O7  | 178.2 (6) | C3—N2—C4 | 114.3 (11) |

Symmetry code(s): (i)  $x, y+1, z$ ; (ii)  $x, y+1, z-1$ ; (iii)  $x+1, y+1, z-1$ ; (iv)  $x+1, y, z-1$ ; (v)  $x+1, y, z$ ; (vi)  $x-1, y, z+1$ ; (vii)  $x-1, y, z$ ; (viii)  $x, y-1, z$ ; (ix)  $x, y-1, z+1$ ; (x)  $x-1, y-1, z+1$ .

**Table S3.** Selected hydrogen-bond parameters in DMAZnD at 100 K.

| $D-H\cdots A$                     | $D-H$ (Å) | $H\cdots A$ (Å) | $D\cdots A$ (Å) | $D-H\cdots A$ (°) |
|-----------------------------------|-----------|-----------------|-----------------|-------------------|
| N1—H1A $\cdots$ O7 <sup>i</sup>   | 0.89      | 1.95            | 2.821 (11)      | 167.5             |
| N1—H1B $\cdots$ O10 <sup>ii</sup> | 0.89      | 1.93            | 2.819 (12)      | 172.0             |
| N2—H2A $\cdots$ O4 <sup>iii</sup> | 0.89      | 2.58            | 3.230 (17)      | 130.4             |
| N2—H2A $\cdots$ O5                | 0.89      | 1.92            | 2.796 (15)      | 169.7             |
| N2—H2B $\cdots$ O8                | 0.89      | 1.99            | 2.843 (15)      | 161.0             |

Symmetry code(s): (i)  $x, y-2, z+1$ ; (ii)  $x, y-1, z$ ; (iii)  $x, y+1, z$ .

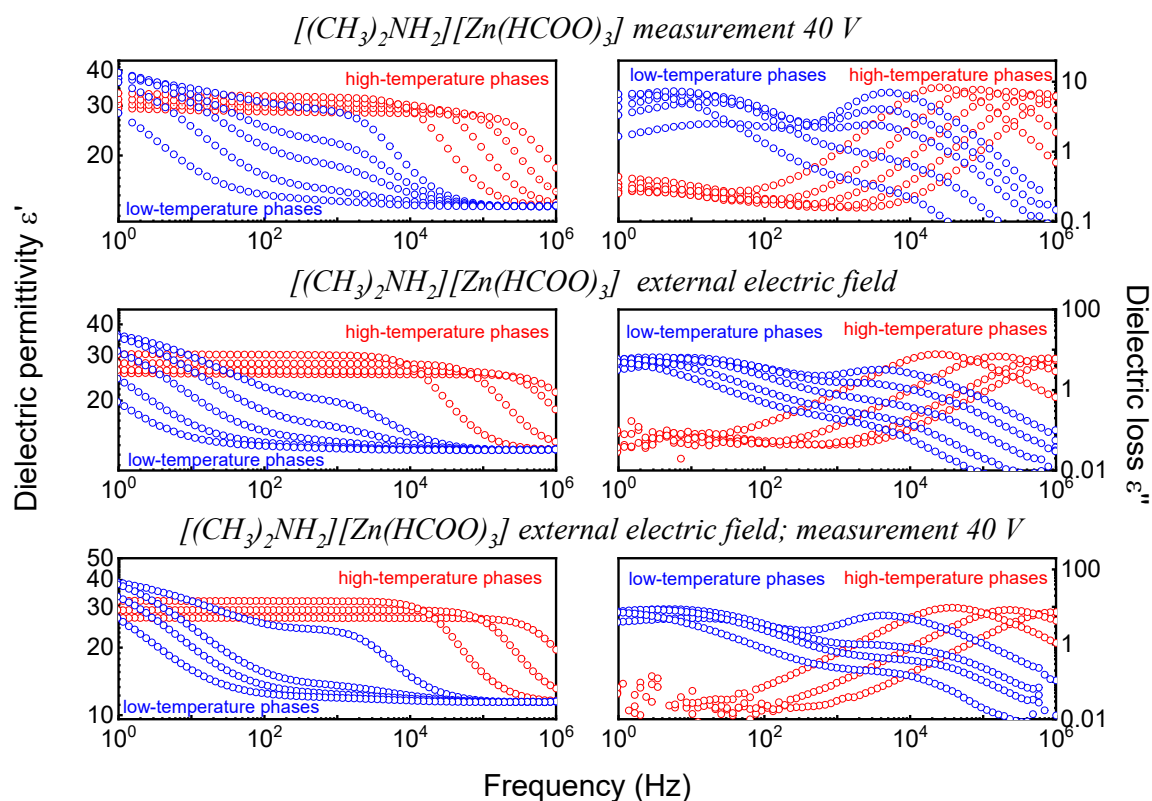

**Figure S5** Frequency dependence of imaginary part of dielectric permittivity and dielectric loss. In all the investigated samples characteristic dipolar relaxation peak shifts to higher frequencies with increasing temperature

**Table S4.** Structure data of all possible experimental and DFT optimized phases of DMAZn

| Number | Lattice parameters, experimental (Å and °)    |                                                           | Symmetry group, experimental | T (K) | Lattice parameters, simulated (Å)             |                                                           | Symmetry group, simulated | k-points | $\Delta E$ (kJ/mol/ per 2 Zn) | Alignment of DMA <sup>+</sup>                              |
|--------|-----------------------------------------------|-----------------------------------------------------------|------------------------------|-------|-----------------------------------------------|-----------------------------------------------------------|---------------------------|----------|-------------------------------|------------------------------------------------------------|
| 1.     | $a = 8.7481$<br>$b = 8.7600$<br>$c = 8.7568$  | $\alpha = 55.69$<br>$\beta = 55.67$<br>$\gamma = 55.76$   | $P\bar{1}$ (2)               | 100   | $a = 8.7262$<br>$b = 8.8993$<br>$c = 8.72830$ | $\alpha = 55.68$<br>$\beta = 55.92$<br>$\gamma = 55.77$   | $P\bar{1}$ (2)            | 3x3x3    | 4.05                          | 3 equivalent positions for each (excluding hydrogen atoms) |
| 2.     | $a = 8.1765$<br>$b = 8.1765$<br>$c = 22.1350$ | $\alpha = 90$<br>$\beta = 90$<br>$\gamma = 120$           | $R\bar{3}c$ (167)            | 100   | $a = 8.2012$<br>$b = 8.2089$<br>$c = 22.4146$ | $\alpha = 90.98$<br>$\beta = 88.04$<br>$\gamma = 119.58$  | $P\bar{1}$ (1)            | 3x3x1    | 0.00                          | 3 equivalent positions for each (including hydrogen atoms) |
| 3.     | $a = 11.8870$<br>$b = 8.1749$<br>$c = 8.8360$ | $\alpha = 90$<br>$\beta = 95.42$<br>$\gamma = 90$         | $C2/c$ (15)                  | 100   | $a = 11.8128$<br>$b = 8.3122$<br>$c = 8.9044$ | $\alpha = 90$<br>$\beta = 95.49$<br>$\gamma = 90$         | $C2/c$ (15)               | 3x3x3    | 3.96                          | 3 equivalent positions for each (no H atoms)               |
| 4.     | $a = 8.1565$<br>$b = 8.1572$<br>$c = 8.6820$  | $\alpha = 63.29$<br>$\beta = 63.24$<br>$\gamma = 60.04$   | $P\bar{1}$ (2)               | ?     | $a = 8.2040$<br>$b = 8.2939$<br>$c = 8.7036$  | $\alpha = 62.17$<br>$\beta = 63.63$<br>$\gamma = 60.12$   | $P\bar{1}$ (2)            | 3x3x3    | 3.96                          | 2 equivalent positions                                     |
| 5.     | $a = 8.1391$<br>$b = 8.1573$<br>$c = 8.6779$  | $\alpha = 90.00$<br>$\beta = 116.83$<br>$\gamma = 119.94$ | $P\bar{1}$ (1)               | 100   | $a = 8.2077$<br>$b = 8.655$<br>$c = 8.6797$   | $\alpha = 89.97$<br>$\beta = 116.25$<br>$\gamma = 129.21$ | $P\bar{1}$ (1)            | 3x3x3    | 0.10                          | 1 non-parallel                                             |
| 6      | -                                             | -                                                         | $Cc$ (9)                     | -     | $a = 14.1721$<br>$b = 8.2599$<br>$c = 8.6913$ | $\alpha = 90.0$<br>$\beta = 120.65$<br>$\gamma = 90.0$    | $Cc$ (9)                  | 3x3x3    | 0.08                          | 1 non-parallel                                             |

**Table S5.** Relative energy and rotation angles before and after structural optimization.

| Structure number | Relative energy (kJ/mol/ per 2 Zn) | Rotation angle before optimization (°) | Rotation angle after optimization (°) |
|------------------|------------------------------------|----------------------------------------|---------------------------------------|
| 0                | 0                                  | 0                                      | 0                                     |
| 1 $\equiv$ 0     | 0                                  | 45                                     | 0                                     |
| 2                | 9.29                               | 90                                     | 101.15                                |
| 3                | 3.84                               | 135                                    | 119.51                                |
| 4                | 9.39                               | 180                                    | 221.76                                |
| 5                | 0.03                               | 225                                    | 239.43                                |
| 6 $\equiv$ 5     | 0.03                               | 270                                    | 239.43                                |
| 7 $\equiv$ 0     | 0                                  | 315                                    | 360 $\equiv$ 0                        |
| 8 $\equiv$ 0     | 0                                  | 360 $\equiv$ 0                         | 360 $\equiv$ 0                        |

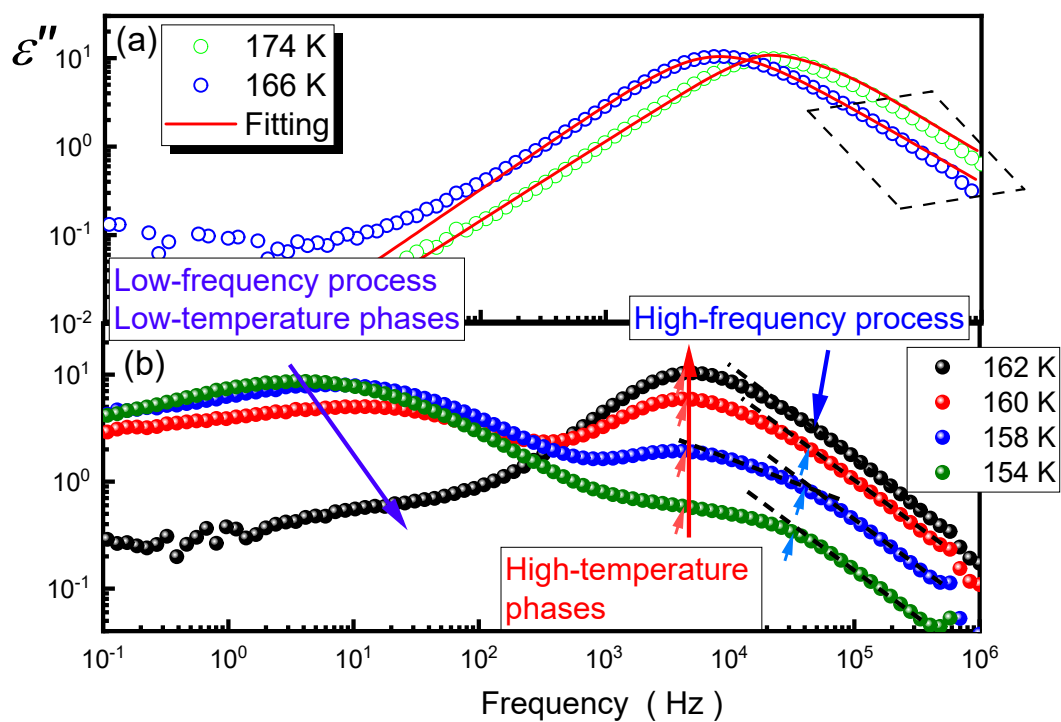

**Figure S6** (a) Fits of the dielectric loss using one Havriliak-Negami functions for DMAZn\_E, the high-frequency part of the relaxation peak indicate broadened. (b) The transition's region.



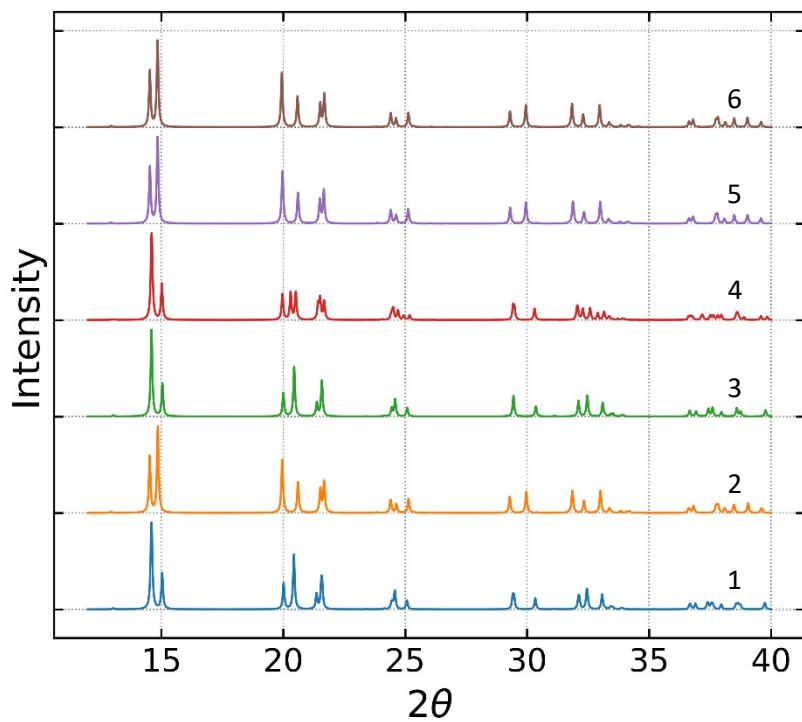

**Figure S7** Calculated PXRD diffractograms for DFT-generated structures, numbers correspond to Table 1. of the main manuscript.

- 1 P. Peksa, J. Trzmiel, K. Fedoruk, A. Gagor, M. Šimenas, A. Ciupa, S. Pawlus, J. Banys, M. Mączka and A. Sieradzki, *J. Phys. Chem. C*, 2019, **123**, 23594–23603.
- 2 P. Peksa, J. Trzmiel, M. Ptak, A. Ciupa-Litwa and A. Sieradzki, *Materials (Basel)*., 2021, **14**, 6150.
